# Supplementary material for: Heart Disease and Arboviruses: A Systematic Review and Meta-Analysis
Source: MDPI journal article supplement (doi:10.3390/v14091988), 2022-09-08
Supplement: s1 [file s1]

**Figure S1.** Funnel plot for evaluation of publication bias with pseudo 95% confidence limits (Begg's test)

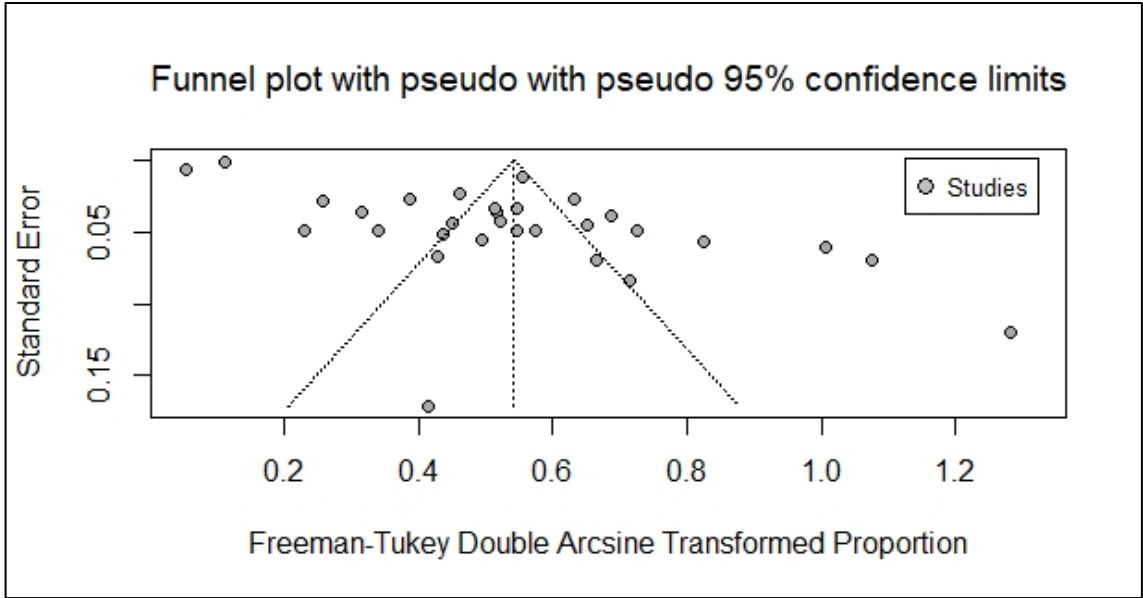

**Figure S2.** Funnel plt with pseudo 95% confidence limits after trim fill adjustment (Egger's test)

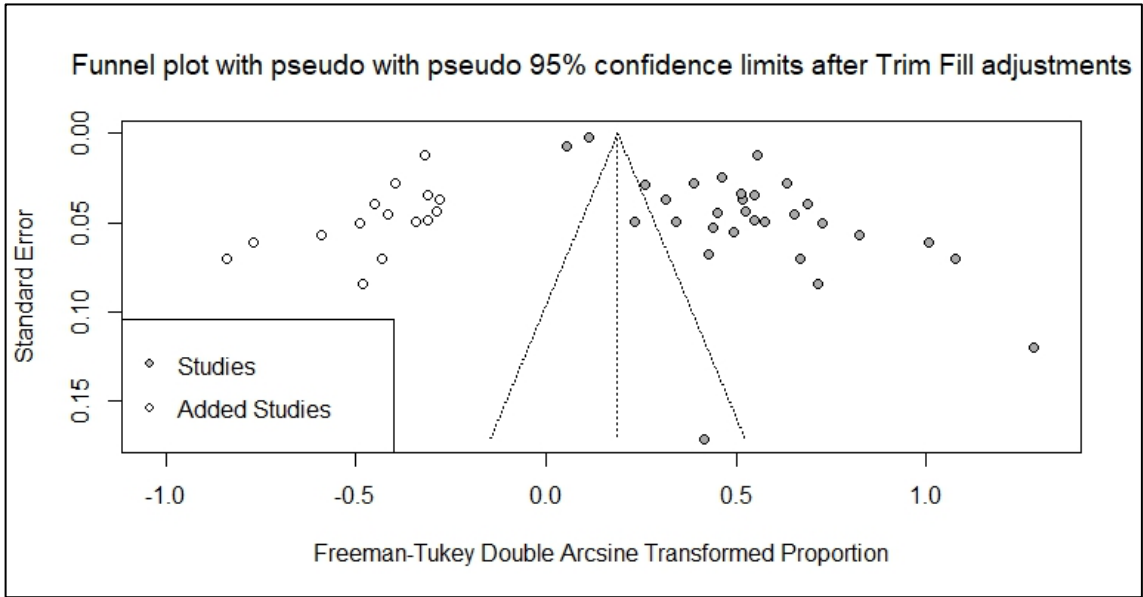

**Figure S3.** Forest plot comparison of frequency of cardiac events in patients with Dengue, grouped by country group.

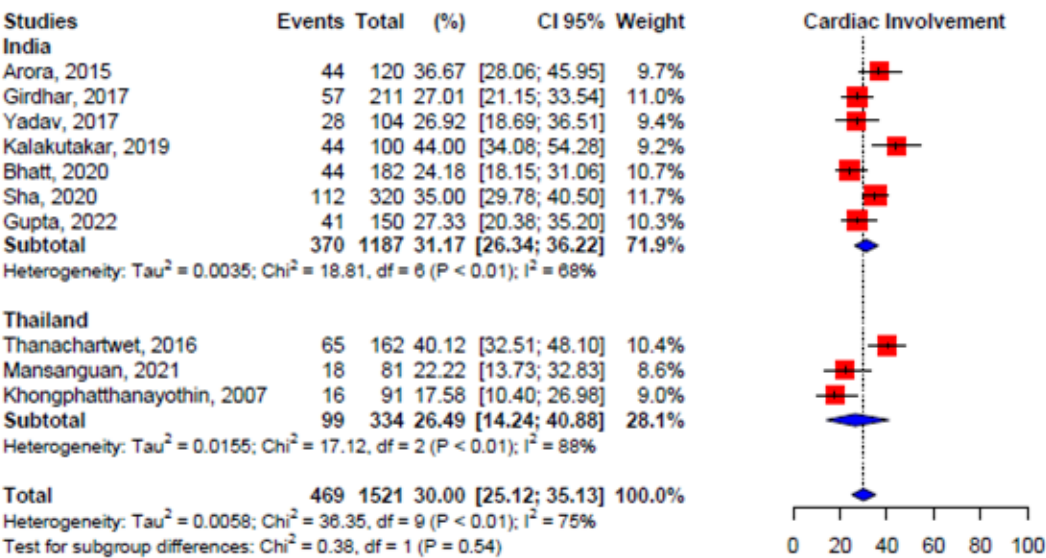

**Table S1.** Methodological quality assessment by the NOS Score

| Author<br>Year<br>Journal                                   | Arbovirus           | Selection                                      |                                              |                              |                                                                                      | Comparability | Outcome/                 |                                                                |                                           |                                      |
|-------------------------------------------------------------|---------------------|------------------------------------------------|----------------------------------------------|------------------------------|--------------------------------------------------------------------------------------|---------------|--------------------------|----------------------------------------------------------------|-------------------------------------------|--------------------------------------|
|                                                             |                     | Representativeness<br>of the exposed<br>cohort | Selection<br>of the non<br>exposed<br>cohort | Ascertainment of<br>exposure | Demonstration<br>that outcome of<br>interest was not<br>present at start of<br>study |               | Assessment<br>of outcome | Was<br>follow-up<br>long<br>enough for<br>outcomes<br>to occur | Adequacy<br>of follow<br>up of<br>cohorts | Total<br>Score/Quality<br>assessment |
| Lakshman et al. 2018<br>Tropical Doctor                     | DENV <sup>#</sup>   | --                                             | --                                           | *                            | --                                                                                   | --            | *                        | *                                                              | *                                         | 4/ Poor                              |
| Arora et al. 2015<br>JAPI                                   | DENV                | --                                             | --                                           | *                            | *                                                                                    | **            | *                        | --                                                             | *                                         | 6/ Fair                              |
| Bhatt et al. 2020<br>Infection                              | DENV                | --                                             | --                                           | *                            | *                                                                                    | **            | *                        | --                                                             | *                                         | 6/ Fair                              |
| Bonifay et al. 2018<br>PLoS ONE                             | CHIKV <sup>##</sup> | --                                             | --                                           | *                            | *                                                                                    | --            | *                        | --                                                             | *                                         | 4/ Poor                              |
| Butunbatu et al. 2019<br>Journal of Tropical<br>Pediatrics  | DENV                | ---                                            | ---                                          | *                            | *                                                                                    | **            | *                        | --                                                             | *                                         | 6/ Fair                              |
| Cabrera-Rego et al.<br>2021<br>Enferm Infec. Microb<br>Clin | DENV                | --                                             | --                                           | *                            | *                                                                                    | **            | *                        | *                                                              | *                                         | 7/ Good                              |
| Sha et al. 2020<br>International Journal of<br>Cardiology   | DENV                | --                                             | --                                           | *                            | *                                                                                    | **            | *                        | *                                                              | *                                         | 7/ Good                              |
| Li et al. 2016<br>Medicine (Baltimore)                      | DENV                | --                                             | --                                           | --                           | *                                                                                    | **            | *                        | *                                                              | *                                         | 6/ Fair                              |
| La-Orkhun et al. 2011<br>Annals of Tropical<br>Paediatrics  | DENV                | --                                             | --                                           | *                            | --                                                                                   | --            | *                        | *                                                              | *                                         | 4/ Poor                              |
| Kirawittaya et al. 2015<br>PLoS NT                          | DENV                | --                                             | *                                            | *                            | *                                                                                    | *             | *                        | *                                                              |                                           | 6/ Fair                              |
| Salgado et al. 2010<br><i>Pediatr Infect Dis</i>            | DENV                | --                                             | --                                           | *                            | --                                                                                   | *             | *                        | *                                                              | *                                         | 5/ Poor                              |
| Yacoub et al. 2017<br>PLoS NTD                              | DENV                | --                                             | --                                           | *                            | --                                                                                   | *             | *                        | *                                                              | *                                         | 5/ Fair                              |
| Thanachartwet et al.<br>2016                                | DENV                | *                                              | --                                           | *                            | --                                                                                   | **            | *                        | *                                                              | *                                         | 7/ Good                              |

|                                                                   |        |    |    |    |    |    |   |    |   |         |
|-------------------------------------------------------------------|--------|----|----|----|----|----|---|----|---|---------|
| PLoS One                                                          |        |    |    |    |    |    |   |    |   |         |
| Khongphatthanayothin et al. 2007<br>Pediatr Crit Care Med         | DENV   | -- | -- | *  | *  | ** | * | *  | * | 7/ Good |
| Cavalcanti et al. 2017<br>PLoS One                                | ZKV### | -- | -- | *  | *  | *  | * | *  | * | 6/ Fair |
| Pothapregada et al. 2026<br>Indian J Pediatr                      | DENV   | -- | -- | *  | -- |    | * | *  | * | 4/ Poor |
| Saldarriaga et al. 2013<br>Revista Colombiana de Cardiología      | DENV   | -- | -- | *  | -- | -- | * | -- | * | 3/ Poor |
| Hussain et al. 2016<br>P J M H S                                  | DENV   | -- | -- | *  | *  | *  | * | *  | * | 6/ Fair |
| Kumar et al. 2013<br>Pediatr Cardiol                              | DENV   |    |    | *  | *  | ** | * | -- | * | 6/ Fair |
| Khositseth et al. 2012<br>Journal of Pediatric Intensive Care     | DENV   | -- | -- | *  | -- | -- | * | *  | * | 4/ Poor |
| Khongphatthanayothin et al. 2003 Intensive Care Med               | DENV   | -- | -- | *  | *  | *  | * | *  | * | 6/ Fair |
| Godoy et al. 2018<br>Pediatr. (Asunción)                          | DENV   | -- | -- | *  | *  | *  | * | *  | * | 6/ Fair |
| Kabra et al. 1998<br>The national medical journal of India        | DENV   | -- | -- | -- | *  | -- | * | *  | * | 4/ Poor |
| Satarasinghe et al. 2007<br>British Journal of Cardiology         | DENV   | -- | -- | *  | *  | *  | * | *  | * | 6/Fair  |
| Obeyesekere et al. 1973<br>American Heart Journal                 | CHIKV  |    | *  | *  | ?  | ?  | * | *  | * | 5/ Poor |
| Wali et al. 1998<br>International Journal of Cardiology           | DENV   | -- | -- | *  | -- | -- | * | *  | * | 4/ Poor |
| Weerakoon et al. 2011<br>BMC Research                             | DENV   | -- | -- | *  | -- | -- | * | -- | * | 3/ Poor |
| Lee et al. 2021 Journal of Microbiology, Immunology and Infection | DENV   | -- | -- | *  | -- | -- | * | *  | * | 4/ Poor |
| Yadav et al. 2017<br>J. Evolution Med. Dent. Sci                  | DENV   | -- | -- | *  | *  | ** | * | ?  | * | 6/ Fair |

|                                                                                                    |      |    |    |   |    |    |   |    |   |         |
|----------------------------------------------------------------------------------------------------|------|----|----|---|----|----|---|----|---|---------|
| Lee et al. 2022<br>Travel Medicine and<br>Infectious Disease                                       | DENV | -- | -- | * | *  | *  | * | *  | * | 6/Fair  |
| Wei et al. 2022<br>PLOS NTD                                                                        | DENV | -- | *  | * | -- | -- | * | *  | * | 5/Fair  |
| Mansanguan et al. 2021<br><i>BMC Infect Dis</i>                                                    | DENV | *  | -- | * | *  | ** | * | *  | * | 8/ Good |
| Kalkutakar et al. 2019<br>International Journal of<br>Current Microbiology<br>and Applied Sciences | DENV | -- | -- | * | *  | ** | * | -- | * | 6/ Fair |
| Miranda et al. 2013<br>Clinical Infectious<br>Diseases English                                     | DENV | -- | -- | * | -- | -- | * | *  | * | 4/ Poor |
| Girdhar et al. 2017<br>Journal of Medibal<br>Science and Clinical<br>Searchh                       | DENV | -- | -- | * | *  | ** | * | -- | * | 6/ Fair |
| Wichmann et al. 2009<br>Southeast Asian J Trop<br>Med Public Health                                | DENV | -- | -- | * | -- | -- | * | -- | * | 3/ Poor |
| Gupta et al. 2022<br>Tropical Doctor<br>English                                                    | DENV | -- | -- | * | *  | *  | * | *  | * | 6/Fair  |

**Legend:** # Dengue Virus; ## Chikungunya Virus; ### Zika Virus

**Table S2.** Meta-regression of the variables gender and clinical severity of Dengue in cardiac outcome

| Variables studied                           | N° of Studies | N° of Patients | CI                 | p-value      |
|---------------------------------------------|---------------|----------------|--------------------|--------------|
| <b>Sex</b>                                  |               |                |                    |              |
| Female                                      | 17            | 1,145          | (-0.0037 - 0.0029) | 0.802        |
| Male                                        | 17            | 1,493          | (-0.0043 - 0.0035) | 0.833        |
| <b>Clinical Classification of Dengue</b>    |               |                |                    |              |
| Dengue Fever                                | 10            | 2,284          | (-0.0001 - 0.0005) | 0.300        |
| Dengue Fever Severe                         | 14            | 1,097          | (-0.0035 - 0.0007) | 0.194        |
| <b>Death associated with cardiac events</b> | 19            | 70,485         | (-0.0062 - 0.0491) | 0.128        |
| <b>Publication Year</b>                     | 19            | 70,485         | (-0.0375 - 0.0070) | <b>0.004</b> |
